# The dynamics of population fecundity in Barents Sea capelin

Elena S. Tereshchenko

Tereshchenko, E. S. 2002. The dynamics of population fecundity in Barents Sea capelin. – ICES Journal of Marine Science, 59: 976–982.

The number of eggs spawned during the spawning season is presumed to be an important factor in determining future year-class strength and, therefore, there is value in looking for the relationship between recruitment and the size of the spawning stock. Data on abundance, length and age composition, maturity ogives, and individual fish fecundity were used for calculating population fecundity (PF) for Barents Sea capelin, *Mallotus villosus* (Müller), for the period spanning the early 1970s to present, and for evaluating factors affecting PF. These were combined with recruitment data to calculate the optimum size of the spawning stock that would maintain it in a stable condition.

© 2002 International Council for the Exploration of the Sea. Published by Elsevier Science Ltd. All rights reserved.

Keywords: absolute fecundity, capelin, females, length and age composition, population fecundity, stock, survival rates.

Received 27 July 2001; accepted 27 April 2002.

*E. S. Tereshchenko: Polar Research Institute of Marine Fisheries and Oceanography (PINRO), 6 Knipovich Street, 183763 Murmansk, Russia; tel: +7 8152 473424; fax: +47 789 10518; e-mail: Belikov@pinro.murmansk.ru.*

## Introduction

Population fecundity (PF) has been studied for a variety of fish species: e.g. Baltic Sea herring (*Clupea harengus*) by Anokhina (1969) and Ojaveer (1974); North Sea cod (*Gadus morhua*) by Daan (1975); North Sea haddock (*Melanogrammus aeglefinus*) by Sahrhage and Wagner (1978); Arcto-Norwegian cod, Barents Sea capelin (*Mallotus villosus*) and Atlanto-Scandian herring by Serebryakov *et al.* (1984, 1985, 1990); Northeast Atlantic blue whiting (*Micromesistius poutassou*) and Atlanto-Scandian herring by Belikov *et al.* (1990), Seliverstova (1990), and Serebryakov *et al.* (1990). This paper presents an analysis of data on abundance, maturity ogives, and individual fish fecundity of Barents Sea capelin that have been collected at the Polar Research Institute (PINRO, Murmansk, Russia) over the period 1970–2000. Calculations of annual fecundity by age- and size-class as well as of the total population are presented, and year-class survival indices are computed. Three levels of population fecundity are defined with respect to stock propagation, safe, minimum, and critical.

## Material and methods

Data on individual fish fecundity for capelin between 2 and 5+ years old were collected during spring from 1970

to 2000, overall, more than 7000 individual female gonads being processed. Population fecundity and survival rates of capelin up to age 5 were calculated using the method of Serebryakov (1988).

Apart from egg counts, the basic data consist of annual age-disaggregated estimates of stock abundance based on trawl–acoustic surveys carried out jointly by Norway and Russia every autumn since the early 1970s (ICES, 2000). The maturing portion of the population was determined by maturity ogives derived from age samples, and the estimated stock numbers were reduced by the instantaneous total mortality coefficient ( $Z$ ) from the time of the surveys until the time of spawning. The sex ratio in the spawning stock is assumed to be 1:1. I have retained Serebryakov's (1988) terminology for defining various aspects of fecundity: AIF, absolute individual fecundity; RIF, relative individual fecundity (number of eggs per gramme); PF, total population fecundity; SPF, safe population fecundity; MRPF, minimum required population fecundity; and CriPF, critical population fecundity. PF was computed by summing the contribution of each age-class,  $a$ , to obtain the total number of eggs spawned:

$$PF = AIF_a \times N_a \times M_a \times R_a \quad (1)$$

where  $N_a$ ,  $M_a$ , and  $R_a$  are abundance, fraction of mature fish, and fraction of females by age-class  $a$  respectively.

Table 1. Mean AIF ('000 eggs) and number of fish sampled (n), 1980–2000, by length- and age-class (dashes indicate no data).

| Year      | Length-class (cm) |   |     |    |     |     |      |     |      |     | Age-class |     |      |    |      |   |     |    |      |     |      |      |      |     |      |    |   |
|-----------|-------------------|---|-----|----|-----|-----|------|-----|------|-----|-----------|-----|------|----|------|---|-----|----|------|-----|------|------|------|-----|------|----|---|
|           | 11                |   | 12  |    | 13  |     | 14   |     | 15   |     | 16        |     | 17   |    | 18   |   | 1   |    | 2    |     | 3    |      | 4    |     | 5    |    |   |
|           | AIF               | n | AIF | n  | AIF | n   | AIF  | n   | AIF  | n   | AIF       | n   | AIF  | n  | AIF  | n | AIF | n  | AIF  | n   | AIF  | n    | AIF  | n   | AIF  | n  |   |
| 1980      | —                 | — | 7.7 | 1  | 8.9 | 71  | 11.4 | 103 | 14.2 | 58  | 15.1      | 6   | 20.9 | 1  | —    | — | —   | —  | 9.7  | 8   | 11.5 | 217  | 12.0 | 15  | —    | —  |   |
| 1981      | —                 | — | —   | —  | 7.0 | 9   | 9.0  | 76  | 11.0 | 84  | 14.8      | 38  | 17.4 | 12 | 17.7 | 1 | —   | —  | 9.4  | 7   | 11.1 | 154  | 11.6 | 58  | 11.2 | 1  |   |
| 1982      | —                 | — | 5.5 | 3  | 6.4 | 37  | 8.0  | 114 | 11.1 | 132 | 13.6      | 65  | 17.0 | 18 | 18.5 | 1 | —   | —  | 9.1  | 108 | 10.6 | 215  | 12.2 | 46  | 12.7 | 1  |   |
| 1983      | —                 | — | 6.1 | 1  | 7.3 | 9   | 9.7  | 20  | 11.8 | 25  | 13.6      | 4   | 14.3 | 1  | —    | — | —   | —  | 9.4  | 23  | 11.1 | 35   | 12.7 | 2   | —    | —  |   |
| 1984      | —                 | — | 6.7 | 1  | 6.9 | 16  | 8.1  | 37  | 11.0 | 15  | 13.7      | 12  | —    | —  | —    | — | —   | —  | 8.6  | 20  | 9.3  | 59   | 12.1 | 2   | —    | —  |   |
| 1985      | —                 | — | 6.3 | 2  | 6.5 | 16  | 9.2  | 24  | 12.8 | 16  | 14.6      | 11  | 18.3 | 3  | 21.3 | 1 | —   | —  | 11.5 | 12  | 10.4 | 54   | 11.7 | 7   | —    | —  |   |
| 1986      | —                 | — | 5.9 | 9  | 6.9 | 132 | 8.7  | 101 | 10.3 | 32  | 12.9      | 3   | —    | —  | —    | — | —   | —  | 7.8  | 87  | 7.9  | 177  | 10.3 | 11  | 13.6 | 2  |   |
| 1987      | —                 | — | 5.3 | 12 | 6.2 | 59  | 8.0  | 34  | 10.2 | 3   | —         | —   | —    | —  | —    | — | —   | —  | 6.5  | 54  | 7.0  | 43   | 7.7  | 9   | —    | —  |   |
| 1988      | —                 | — | 6.7 | 6  | 8.1 | 39  | 9.6  | 77  | 11.2 | 10  | —         | —   | —    | —  | —    | — | —   | —  | 9.1  | 119 | 10.7 | 9    | —    | —   | —    | —  |   |
| 1989      | —                 | — | —   | —  | 7.6 | 19  | 9.6  | 51  | 12.3 | 26  | 15.3      | 3   | —    | —  | —    | — | —   | —  | 7.3  | 1   | 10.1 | 84   | 10.5 | 14  | —    | —  |   |
| 1990      | —                 | — | 7.4 | 4  | 8.6 | 29  | 10.8 | 46  | 12.3 | 45  | 13.5      | 11  | 21.6 | 2  | —    | — | —   | —  | 10.1 | 66  | 11.9 | 58   | 13.9 | 8   | 11.7 | 1  |   |
| 1991      | 7.7               | 1 | 5.7 | 1  | 8.1 | 11  | 8.9  | 49  | 11.4 | 66  | 14.6      | 22  | 17.6 | 5  | —    | — | —   | —  | 9.7  | 2   | 9.9  | 98   | 14.6 | 16  | 14.3 | 1  |   |
| 1992      | —                 | — | 5.0 | 5  | 6.4 | 30  | 8.3  | 60  | 11.5 | 68  | 14        | 17  | 16.7 | 1  | —    | — | —   | —  | 8.6  | 93  | 10.9 | 81   | 11.3 | 7   | —    | —  |   |
| 1993      | —                 | — | 6.4 | 33 | 6.8 | 91  | 8.2  | 102 | 10.7 | 51  | 12.9      | 10  | —    | —  | —    | — | —   | —  | 8.2  | 2   | 7.3  | 77   | 8.4  | 201 | 11.2 | 7  | — |
| 1994      | 3.5               | 1 | 4.4 | 5  | 5.6 | 41  | 7.0  | 104 | 8.2  | 61  | 8.2       | 16  | —    | —  | —    | — | —   | —  | 5.7  | 61  | 7.5  | 145  | 8.0  | 21  | 8.7  | 1  |   |
| 1995      | —                 | — | 5.9 | 13 | 7.4 | 38  | 8.7  | 33  | 10.8 | 11  | —         | —   | —    | —  | —    | — | —   | —  | 6.6  | 18  | 7.7  | 38   | 9.0  | 33  | 10.3 | 6  | — |
| 1996      | —                 | — | 6.2 | 11 | 8.5 | 54  | 10.3 | 110 | 11.8 | 69  | 14.2      | 22  | 8.1  | 1  | —    | — | —   | —  | 8.7  | 64  | 10.8 | 117  | 11.4 | 82  | 12.3 | 4  | — |
| 1997      | —                 | — | 8.1 | 6  | 8.2 | 53  | 9.9  | 60  | 12.3 | 67  | 16.5      | 57  | 19.3 | 12 | —    | — | —   | —  | 9.9  | 53  | 11.9 | 140  | 14.2 | 48  | 16.5 | 11 | — |
| 1998      | —                 | — | 7.7 | 10 | 9.1 | 73  | 12.1 | 120 | 14.4 | 63  | 17.2      | 28  | 20.9 | 7  | —    | — | —   | —  | 7.7  | 28  | 11.5 | 163  | 14.3 | 88  | 17.8 | 22 | — |
| 1999      | —                 | — | 7.9 | 1  | —   | —   | 10.2 | 41  | 12.0 | 172 | 14.3      | 89  | 16.8 | 15 | 18.9 | 2 | 8.1 | 2  | 11.6 | 116 | 12.7 | 143  | 14.3 | 50  | 17.3 | 9  | — |
| 2000      | —                 | — | —   | —  | 7.9 | 7   | 10.2 | 60  | 12.7 | 77  | 15.8      | 87  | 18.9 | 40 | —    | — | —   | —  | 9.1  | 61  | 13.5 | 115  | 16.0 | 81  | 18.6 | 13 | — |
| 1980–1989 | —                 | — | 5.9 | 35 | 7.2 | 407 | 9.2  | 637 | 11.6 | 401 | 14.1      | 142 | 17.3 | 35 | 19.2 | 3 | 6.0 | 7  | 8.8  | 522 | 10.2 | 977  | 11.5 | 150 | 12.8 | 4  | — |
| 1990–2000 | 5.6               | 2 | 6.4 | 89 | 7.7 | 427 | 9.5  | 785 | 11.5 | 750 | 14.0      | 359 | 18.3 | 83 | 18.9 | 2 | 8.2 | 96 | 9.3  | 808 | 10.6 | 1199 | 13.6 | 336 | 17.1 | 58 | — |

Table 2. Mean AIF, RIF, length, weight, and age of capelin females sampled by year, 1970–2000 (n is the sample size, and dashes indicate no data).

| Year      | AIF<br>(‘000 eggs) | RIF<br>(eggs g <sup>-1</sup> ) | Length<br>(cm) | Weight<br>(g) | Age<br>(years) | n    |
|-----------|--------------------|--------------------------------|----------------|---------------|----------------|------|
| 1970*     | 14.3               | —                              | 15.4           | 21.4          | 4.2            | 151  |
| 1971*     | 11.3               | —                              | 14.7           | 18.6          | 3.9            | 325  |
| 1972*     | 13.1               | —                              | 14.9           | 18.5          | 4.1            | 123  |
| 1973*     | 9.9                | —                              | 14.9           | 19.8          | 4.4            | 376  |
| 1974*     | 14.2               | —                              | 14.8           | 21.2          | 4.0            | 613  |
| 1975*     | 12.4               | —                              | 14.8           | 19.2          | 4.0            | 196  |
| 1976*     | 12.5               | —                              | 14.5           | 18.1          | 3.9            | 351  |
| 1977*     | 12.9               | —                              | 14.8           | 20.0          | 4.3            | 557  |
| 1978*     | 13.4               | —                              | 15.1           | 20.8          | 4.0            | 414  |
| 1979*     | 12.5               | —                              | 14.5           | 18.7          | 4.0            | 509  |
| 1980      | 11.4               | 701                            | 14.0           | 16.3          | 4.0            | 240  |
| 1981      | 11.2               | 534                            | 14.9           | 20.9          | 4.2            | 220  |
| 1982      | 10.4               | 535                            | 14.8           | 19.4          | 3.8            | 370  |
| 1983      | 10.5               | 610                            | 14.5           | 17.2          | 3.7            | 60   |
| 1984      | 9.2                | 568                            | 14.3           | 16.2          | 3.8            | 81   |
| 1985      | 10.7               | 608                            | 14.5           | 17.5          | 3.9            | 73   |
| 1986      | 8.0                | 572                            | 13.6           | 14.4          | 3.7            | 277  |
| 1987      | 6.7                | 578                            | 13.3           | 11.7          | 3.5            | 108  |
| 1988      | 9.2                | 646                            | 13.7           | 14.2          | 3.0            | 132  |
| 1989      | 10.1               | 591                            | 14.1           | 17.1          | 3.1            | 99   |
| 1990      | 11.1               | 651                            | 14.3           | 17.0          | 3.5            | 137  |
| 1991      | 10.9               | 595                            | 14.6           | 18.3          | 3.5            | 155  |
| 1992      | 9.7                | 552                            | 14.4           | 17.5          | 3.5            | 181  |
| 1993      | 8.2                | 577                            | 13.7           | 14.1          | 3.7            | 287  |
| 1994      | 7.1                | 480                            | 14.2           | 14.8          | 3.8            | 228  |
| 1995      | 8.1                | 601                            | 13.4           | 13.5          | 3.3            | 95   |
| 1996      | 10.5               | 639                            | 14.1           | 16.4          | 3.1            | 267  |
| 1997      | 12.1               | 607                            | 14.6           | 19.9          | 4.0            | 255  |
| 1998      | 12.4               | 578                            | 15.2           | 21.8          | 4.3            | 301  |
| 1999      | 12.7               | 587                            | 15.2           | 21.6          | 3.8            | 320  |
| 2000      | 13.9               | 658                            | 15.1           | 21.1          | 4.1            | 271  |
| 1970–1979 | 12.7               | —                              | 14.8           | 19.7          | 4.1            | 3615 |
| 1980–1989 | 9.9                | 588                            | 14.2           | 16.9          | 3.7            | 1660 |
| 1990–2000 | 10.6               | 584                            | 14.5           | 17.8          | 3.7            | 2497 |

\*Data updated from Galkin and Kovalev (1975).

SR<sub>a</sub> represents the percentage surviving from the initial number of eggs spawned until the year-class had reached age a. As an integrated index of environmental conditions during early ontogenesis, SR can be used for calculating population fecundity, generating year-classes of predefined abundance levels under different survival rates. On the basis of data on abundance of the spawning stock, SR<sub>2</sub>-values and year-class strength of two-year-olds, three levels of PF and associated biomass were established.

- A safe population fecundity (SPF) ensures strong year-classes ( $>300 \times 10^9$ ) even with average survival up to age 2 during early ontogenesis ( $0.05\% > SR_2 > 0.02\%$ ).
- The minimum required population fecundity (MRPF) corresponds to the level that generates strong year-classes under favourable conditions for

survival, but produces average year-classes ( $100 \times 10^9 < N_2 < 300 \times 10^9$ ) with average survival.

- The critical population fecundity (CriPF) is the level that generates a strong year-class under only the best possible conditions for survival (1989:  $SR_2 = 0.72\%$ ). In other words, a decline of PF below CriPF excludes the possibility that a strong year-class will appear.

## Results

### Individual fecundity

Mean AIF by size-class, age-class, and year are given in Table 1, and Table 2 lists estimates of mean AIF, RIF, length, weight, and age of the samples processed. AIF varied within a wide range, averaging 10 000–12 000 eggs. Minimum fecundity was 1876 eggs in a 3-year-old

Table 3. Mean AIF of capelin (thousand eggs) and number of fish sampled (n) belonging to strong (abundance index >500: 1979–1981, 1983, 1989) and poor (abundance index <100: 1970, 1978, 1987, 1992–1995) year-classes by age.

| Age  | Strong |     | Poor |      |
|------|--------|-----|------|------|
|      | AIF    | n   | AIF  | n    |
| 2    | 9.7    | 2   | 6.6  | 19   |
| 3    | 8.6    | 331 | 9.9  | 288  |
| 4    | 9.5    | 426 | 12.7 | 1002 |
| 5    | 11.0   | 56  | 14.1 | 129  |
| 6    | 13.6   | 2   | 17.5 | 32   |
| Mean | 9.2    | 817 | 12.4 | 1500 |

female of 13.4 cm and 14.8 g, while maximum fecundity was 34 146 eggs in a 4-year-old female of 17.2 cm and 31.5 g. Mean values were high in the 1970s, and low during the 1980s and early 1990s. In the most recent years, AIF, as well as other biological parameters, have returned to the level of the 1970s.

During the period of investigation, the capelin population has twice been in a state of depletion, during the years 1986–1990 and 1993–1998. At the beginning of both periods the population was characterized not only by low abundance and reduced average age, but also by a drastic decrease in mean AIF, reaching minima of 6700 eggs in 1987 and 7100 eggs in 1994. This decline cannot be explained just by variations in the length and age structure of the population, because AIF also decreased in fish of the same size and age (Table 1).

Furthermore, RIF in 1994 was the lowest on record for the entire period.

When data are grouped by year-class strength, based on abundance indices, AIF of all age-classes proved to be generally higher (average 35%) for poor year-classes than for strong ones, except for the poorly represented age 2 (Table 3).

### Population fecundity and survival

The total number of eggs released by all females during the spawning season (PF) depends mainly on the abundance of mature fish. However, deviations in PF from direct measures of female spawning-stock biomass (SSB) show that variations in the length and age composition may influence AIF to such a degree that they have a marked effect on the PF (Figure 1). PF and SSB were highest in 1976 and 1980 respectively.

In the 1970s, with a consistently high PF and apparently under favourable conditions for survival, year-classes were relatively strong (Figure 1). In the 1980s, survival (and therefore also recruitment) declined, followed by a stock collapse. The associated reduction in the size and age structure of the stock resulted in a lower average individual female fecundity. PF decreased to an all-time minimum in 1987, but apparently extremely high rates of survival in 1988 and 1989 were instrumental in initiating a rapid stock recovery. Although PF fluctuations during the 1990s were similar to those observed in the 1980s, the PF during the past two decades failed to reach the high values of the 1970s.

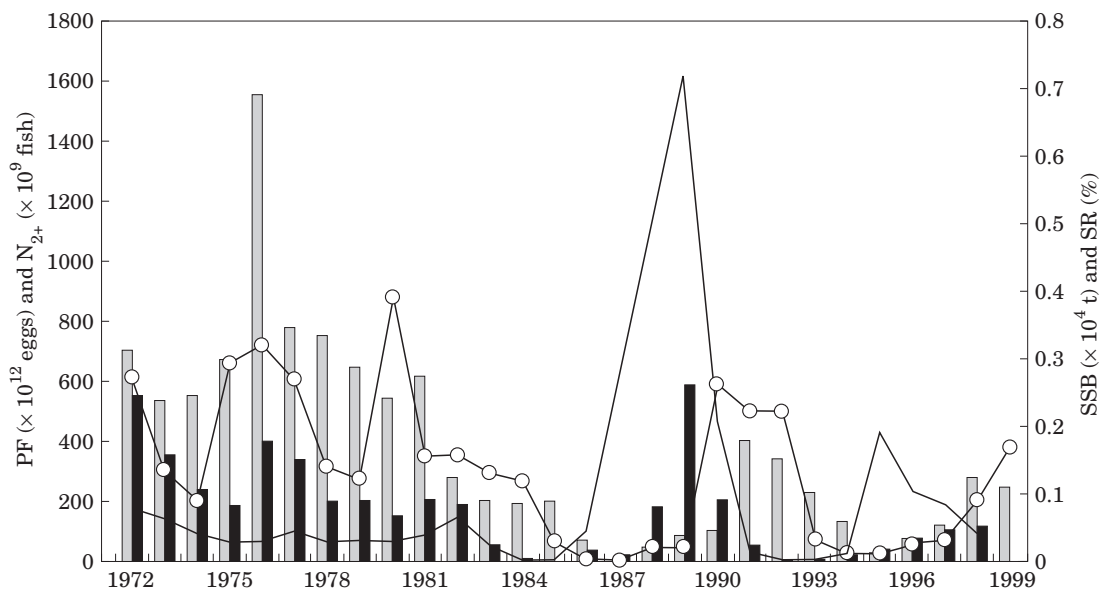

Figure 1. Population fecundity (PF,  $\times 10^{12}$  eggs, grey columns), spawning stock (SSB,  $\times 10^4$ , open circles), abundance ( $N_{2+}$ ,  $\times 10^9$ , dark columns), and survival rates (SR, %, solid line) of 2-year-old capelin, 1972–1999.

Table 4. Contribution by age-class to population fecundity (eggs  $\times 10^{12}$ ), 1972–2000 (dashes indicate no data).

| Year | Age-class |      |      |      |     |     | Total |
|------|-----------|------|------|------|-----|-----|-------|
|      | 2         | 3    | 4    | 5    | 6   | 7   |       |
| 1972 | —         | 52   | 404  | 207  | 17  | —   | 679   |
| 1973 | —         | 15   | 265  | 230  | 21  | —   | 530   |
| 1974 | —         | 50   | 315  | 182  | 2   | —   | 549   |
| 1975 | —         | 50   | 508  | 106  | 3   | —   | 668   |
| 1976 | —         | 151  | 933  | 464  | 3   | —   | 1551  |
| 1977 | —         | 66   | 350  | 298  | 50  | 8   | 772   |
| 1978 | —         | 68   | 427  | 223  | 30  | 1   | 749   |
| 1979 | —         | 70   | 447  | 115  | 9   | 1   | 642   |
| Mean |           | 66   | 456  | 227  | 17  | 3   | 770   |
| %    | 8.6       | 59.4 | 29.4 | 2.2  | 0.4 | 100 |       |
| 1980 | —         | 43   | 454  | 41   | 1   | —   | 539   |
| 1981 | —         | 25   | 397  | 178  | 8   | —   | 606   |
| 1982 | —         | 55   | 153  | 68   | 3   | —   | 277   |
| 1983 | —         | 42   | 139  | 13   | 0   | —   | 194   |
| 1984 | —         | 12   | 149  | 24   | 0   | —   | 185   |
| 1985 | —         | 4    | 139  | 50   | 3   | —   | 195   |
| 1986 | —         | 12   | 43   | 8    | —   | —   | 63    |
| 1987 | —         | 3    | 4    | 1    | —   | —   | 8     |
| 1988 | 2         | 32   | 6    | 0    | —   | —   | 40    |
| 1989 | 0         | 42   | 30   | 8    | —   | —   | 81    |
| Mean | 1         | 26   | 151  | 38   | 2   | —   | 219   |
| %    | 0.6       | 11.9 | 69.2 | 17.3 | 1.0 | —   | 100   |
| 1990 | 1         | 61   | 31   | 2    | 0   | —   | 95    |
| 1991 | 1         | 156  | 128  | 98   | 15  | —   | 398   |
| 1992 | —         | 180  | 143  | 17   | —   | —   | 339   |
| 1993 | 1         | 15   | 199  | 11   | —   | —   | 226   |
| 1994 | —         | 33   | 81   | 14   | 1   | —   | 128   |
| 1995 | 4         | 5    | 9    | 3    | —   | —   | 20    |
| 1996 | 17        | 24   | 27   | 1    | —   | —   | 69    |
| 1997 | 1         | 16   | 55   | 37   | 10  | —   | 118   |
| 1998 | —         | 63   | 101  | 68   | 46  | —   | 277   |
| 1999 | 1         | 141  | 64   | 31   | 8   | —   | 246   |
| 2000 | 1         | 67   | 147  | 126  | 38  | —   | 379   |
| Mean | 3         | 69   | 89   | 37   | 17  | —   | 216   |
| %    | 1.4       | 32.1 | 41.5 | 17.2 | 7.8 | —   | 100   |

The contribution of females of different age to the population fecundity has varied over the period (Table 4). In the 1970s, most eggs were spawned by 4- and 5-year-old fish. Between 1988 and 1992 and again in 1999, 3- and 4-year-old capelin played the key role in population reproduction. Since 1988, 2-year-old females have also contributed to reproductive output.

The strong year-class of 1972 was the most productive of the entire period. Females of that year-class spawned  $1312 \times 10^{12}$  eggs during the seasons 1975–1979. The lowest contribution by any year-class was just  $17 \times 10^{12}$  eggs, produced by the poor year-class of 1983. The greatest difference over the period 1970–2000 period is, therefore, in the order of approximately 80 to 1 (Table 4).

With the exception of the 1989 year-class, all strong year-classes (abundance of 2-year-olds  $>300 \times 10^9$  fish) between 1972 and 1999 resulted from high PFs with good or average survival (Figure 1). The strong 1989 year-class resulted from a low PF, apparently owing to extremely good survival. Year-classes of medium strength (abundance of 2-year-olds of  $100\text{--}300 \times 10^9$  fish) generally resulted from a high PF and good or average survival. Exceptions were the year-classes of 1988 and 1990, when PF was low but survival was excellent. Poor year-classes (abundance of 2-year-olds  $<100 \times 10^9$  fish) coincide with poor survival and/or few spawned eggs.

Estimated  $SR_{2s}$  varied throughout the study period, from 0.72 in 1989 to 0.001 in 1985. Maximum SR was recorded during periods in the 1980s and 1990s when the fishery was closed to rebuild the stock. However, even under these favourable conditions for survival, only one strong year-class appeared, other year-classes from these periods being average or poor, probably a direct consequence of the low PF.

On the basis of SR values, the safe egg production level (SPF) is estimated to be around  $750 \times 10^{12}$  eggs, roughly corresponding to a female SSB of 3 000 000 t, which should ensure the appearance of a strong year-class even with average survival. This PF was only exceeded in 1976 and 1977, and in both cases a strong year-class emerged with average survival. The minimum required PF (MRPF), defined as the PF level at which natural fluctuations of the ambient environment are reflected in year-class abundance, was estimated to be about  $325 \times 10^{12}$  eggs (SSB: 1 000 000 t). When PF is at the critical level (CriPF) and the stock is in a state of severe depression, strong year-classes only appear when survival is excellent (as in 1989), but there is no guarantee of the formation of medium year-classes under average ambient conditions. CriPF is estimated to be about  $50 \times 10^{12}$  eggs (SSB: 200 000 t).

Table 5 provides data on population fecundity and survival rates for capelin aged between 1 and 5 years. Conditions of life vary between years and depend on a complex of biotic and abiotic factors. SR, being an integral indicator of these conditions, is also subject to considerable fluctuation. I shall not go into a detailed description of the factors affecting capelin survival. However, SR clearly increased considerably in the years when the fishery was halted. Thus, the closure of the capelin fishery in 1986 was immediately reflected in the survival rate. Already in 1987, SR started to increase, reaching a maximum in 1989. After the fishery was resumed in 1991, SR dropped to the lowest value for the entire period. Poor survival resulted in recruitment failure and a massive stock decline, which again led to closure of the fishery. During this second depression, stock recovery was slower than in the 1980s. In 1994 (the first year of the fishing ban), the stock did not

Table 5. Numbers surviving ( $N \times 10^9$ ) and survival rates (SR, %) of capelin from egg ( $PF \times 10^{12}$ ) to subsequent ages (numbers at age from October surveys; + signifies presence, but not at the number of decimals used; dashes indicate no data).

| Year | PF   | N <sub>1</sub> | SR <sub>1</sub> | N <sub>2</sub> | SR <sub>2</sub> | N <sub>3</sub> | SR <sub>3</sub> | N <sub>4</sub> | SR <sub>4</sub> | N <sub>5</sub> | SR <sub>5</sub> |
|------|------|----------------|-----------------|----------------|-----------------|----------------|-----------------|----------------|-----------------|----------------|-----------------|
| 1972 | 679  | 529            | 0.078           | 547            | 0.081           | 296            | 0.074           | 77             | 0.011           | 7              | +               |
| 1973 | 530  | 305            | 0.057           | 348            | 0.066           | 163            | 0.031           | 40             | 0.008           | 1              | +               |
| 1974 | 549  | 190            | 0.035           | 233            | 0.042           | 99             | 0.018           | 9              | 0.002           | +              | +               |
| 1975 | 668  | 211            | 0.032           | 175            | 0.026           | 76             | 0.011           | 5              | 0.001           | +              | +               |
| 1976 | 1551 | 359            | 0.023           | 392            | 0.025           | 114            | 0.007           | 33             | 0.002           | +              | +               |
| 1977 | 772  | 84             | 0.011           | 333            | 0.043           | 155            | 0.020           | 14             | 0.002           | 0              | 0.000           |
| 1978 | 749  | 12             | 0.002           | 196            | 0.026           | 48             | 0.006           | 2              | +               | 0              | 0.000           |
| 1979 | 642  | 270            | 0.042           | 195            | 0.030           | 57             | 0.009           | +              | +               | 0              | 0.000           |
| 1980 | 539  | 403            | 0.075           | 148            | 0.027           | 38             | 0.007           | 3              | 0.001           | 0              | 0.000           |
| 1981 | 606  | 528            | 0.087           | 200            | 0.033           | 48             | 0.008           | 1              | +               | 0              | 0.000           |
| 1982 | 277  | 515            | 0.186           | 187            | 0.067           | 21             | 0.007           | 0              | +               | 0              | 0.000           |
| 1983 | 194  | 155            | 0.080           | 48             | 0.025           | 3              | 0.002           | 0              | +               | 0              | 0.000           |
| 1984 | 185  | 39             | 0.021           | 5              | 0.003           | +              | +               | 0              | 0.000           | 0              | 0.000           |
| 1985 | 196  | 6              | 0.003           | 2              | 0.001           | +              | +               | +              | +               | 0              | 0.000           |
| 1986 | 63   | 38             | 0.059           | 29             | 0.045           | 3              | 0.004           | +              | +               | 0              | 0.000           |
| 1987 | 8    | 21             | 0.272           | 18             | 0.230           | 16             | 0.210           | 1              | 0.015           | 0              | 0.000           |
| 1988 | 40   | 189            | 0.477           | 178            | 0.448           | 33             | 0.083           | 1              | 0.003           | 0              | 0.000           |
| 1989 | 81   | 700            | 0.866           | 580            | 0.717           | 129            | 0.159           | 2              | 0.003           | 0              | 0.000           |
| 1990 | 95   | 402            | 0.425           | 196            | 0.208           | 17             | 0.018           | +              | +               | 0              | 0.000           |
| 1991 | 398  | 351            | 0.088           | 53             | 0.013           | 4              | 0.001           | +              | +               | 0              | 0.000           |
| 1992 | 339  | 2              | 0.001           | 3              | 0.001           | 2              | 0.000           | +              | +               | 0              | 0.000           |
| 1993 | 226  | 40             | 0.009           | 8              | 0.004           | 2              | 0.001           | +              | +               | +              | +               |
| 1994 | 128  | 7              | 0.006           | 12             | 0.009           | 2              | 0.001           | 1              | +               | 0              | 0.000           |
| 1995 | 20   | 82             | 0.405           | 39             | 0.193           | 11             | 0.052           | 1              | 0.004           | +              | +               |
| 1996 | 69   | 99             | 0.144           | 73             | 0.106           | 27             | 0.039           | 1              | 0.001           | —              | —               |
| 1997 | 118  | 179            | 0.152           | 102            | 0.086           | 34             | 0.029           | —              | —               | —              | —               |
| 1998 | 277  | 156            | 0.056           | 111            | 0.040           | —              | —               | —              | —               | —              | —               |
| 1999 | 246  | 449            | 0.183           | —              | —               | —              | —               | —              | —               | —              | —               |
| 2000 | 379  | —              | —               | —              | —               | —              | —               | —              | —               | —              | —               |
| Mean | 366  | 225            | 0.138           | 163            | 0.096           | 54             | 0.030           | 8              | 0.002           | 1              | +               |

respond immediately, and survival rates did not reach an above-average level until 1995 (Table 5).

## Discussion

Under favourable conditions for survival, a high PF automatically means the appearance of a strong year-class. However, average survival, even at a high PF, does not ensure the formation of strong year-classes. For instance, average survival and a high PF ( $539 \times 10^{12}$  eggs) in 1980 generated only an average year-class, while a similar PF generated a strong year-class under prevailing favourable conditions for survival in 1973. Furthermore, when survival was poor, not even a single average year-class appeared, irrespective of whether PF was high or low.

An analysis of fecundity data in relation to year-class strength indicates that the AIF of poor year-classes is higher than that of strong ones. Apparently, this is a typical natural response during periods of low stock abundance, which may be associated with improved feeding opportunity owing to less competition. However, it should be borne in mind that, in situations when

acoustic surveys record extremely low abundance of the adult stock, deviations from the “true” state of the stock tend to be exaggerated in relation to a normal situation. Furthermore, experience has shown that, under such conditions, stock size is more likely to be under- than overestimated. While the extremely high SR<sub>2</sub>s in 1987, 1988, 1989, and 1995 may thus be classified as “overshots”, they should nevertheless be accepted as indications of the general trends observed.

In my opinion, the decline in fecundity during the period of stock depletion can be explained as follows.

- (1) Any fishery removes primarily the fastest-growing part of the population, and recruitment consequently becomes increasingly dependent on slow-growing fish, which leads to reduced population fecundity. This effect is accentuated if growth rates are reduced even further by adverse abiotic factors.
- (2) Heavy fishing pressure in the late 1970s and early 1980s radically altered the age and size structure of the stock, and the contribution of subsequent age-classes to the population fecundity changed



accordingly. Thus, the contribution of age-class 3 to population fecundity increased from an average of about 10% during the years 1972–1986 to about 50% during the years 1987–1992 (Table 4). Younger and smaller spawners result in a severe overall fecundity decline (Luka *et al.*, 1991).

The best rates of survival were recorded in years when the fishery was banned, indicating the negative impact of fishing on stock development. When the stock is stable and the spawning stock varies around or exceeds the minimum abundance level required (MRPF), year-class strength is determined by survival. It is only in years when stock abundance is low that PF becomes the principal factor contributing, in combination with favourable survival, to the formation of strong year-classes. These aspects are captured in the estimated values for SPF, MRPF, and CriPRF that may be used as broad guidelines for managing the fishery:

SPF –  $750 \times 10^{12}$  eggs (SSB, 3 000 000 t);

MRPF –  $325 \times 10^{12}$  eggs (SSB, 1 000 000 t);

CPF –  $50 \times 10^{12}$  eggs (SSB, 200 000 t).

For management purposes, stock size should probably exceed MRPF to maintain the multi-age structure of a stock and to preserve natural fluctuations in stock abundance. This by itself should help ensure that the SSB does not fall to a critical level.

## References

- Anokhina, L. E. 1969. Regularities of fish fecundity variations by example of spring- and autumn-spawning Baltic herring. Nauka, Moscow. 295 pp. (in Russian).
- Belikov, S. V., Tereshchenko, E. S., and Isaev, N. A. 1990. Population fecundity and strength of the Northeast Atlantic blue whiting year-classes. *In* Proceedings of the IV Soviet–Norwegian Symposium, pp. 373–382. PINRO Press, Murmansk (in Russian).
- Daan, N. 1975. Consumption and production of the North Sea cod, *Gadus morhua*: an assessment of the ecological status of the stock. *Netherlands Journal of Sea Research*, 9: 24–55.
- Galkin, A. S., and Kovalev, S. M. 1975. Fecundity of capelin *Mallotus villosus villosus* (Müller) of the Barents Sea. *Voprosy ihtiologii*, 15: 646–651 (in Russian).
- ICES. 2000. Report of the Northern Pelagic and Blue Whiting Fisheries Working Group. ICES CM 2000/ACFM: 16.
- Luka, G. I., Ushakov, N. G., Ozhigin, V. K., Tereshchenko, E. S., Oganesyanyan, S. A., Dvinin, Yu. F., and Bochkov, Yu. A. 1991. Recommendations on rational exploitation of the Barents Sea capelin. PINRO Press, Murmansk. 193 pp. (in Russian).
- Ojaveer, E. A. 1974. Fecundity of the autumn herring *Clupea harengus membras* (Linne) of the northeast Baltic Sea. *Voprosy ihtiologii*, 14: 645–654 (in Russian).
- Sahrhage, D., and Wagner, G. 1978. On fluctuations in the haddock population of the North Sea. *Rapports et Procès-Verbaux des Réunions du Conseil International pour l'Exploration de la Mer*, 172: 72–85.
- Seliverstova, E. 1990. Structure of the spawning stock and population fecundity of Atlanto-Scandian herring. *In* Proceedings of IV Soviet–Norwegian Symposium, pp. 61–121. PINRO Press, Murmansk (in Russian).
- Serebryakov, V. P. 1988. Population fecundity and year-class strength of some commercial fish species. *ICES 1988 ELHS*, N: 14, 28 pp.
- Serebryakov, V. P., Belikov, S. V., and Tereshchenko, E. S. 1990. Reproductive capacity in herring and blue whiting. *In* Proceedings of the IV Soviet–Norwegian Symposium, pp. 214–230. PINRO Press, Murmansk (in Russian).
- Serebryakov, V. P., Borisov, V. M., and Aldonov, V. K. 1984. Population fecundity and strength of Arcto-Norwegian cod year-classes. *In* Reproduction and Recruitment of Cod. Proceedings of the 1st Soviet–Norwegian Symposium, pp. 240–260. VNIRO Press, Moscow (in Russian).
- Serebryakov, V. P., Ushakov, N. G., Aldonov, V. K., and Astafjeva, A. V. 1985. Population fecundity and strength of the Barents Sea capelin year-classes in 1972–1984. *In* Biology and Fishery of the Barents Sea Capelin. Proceedings of the 2nd Soviet–Norwegian Symposium, pp. 28–34. PINRO Press, Murmansk (in Russian).
